# Supplementary material for: Structure and electrochemical properties of hierarchically porous carbon nanomaterials derived from hybrid ZIF-8/ZIF-67 bi-MOF coated cyclomatrix poly(organophosphazene) nanospheres
Source: Royal Society of Chemistry journal article supplement (doi:10.1039/d0nj00040j), 2020-01-01
Supplement: d0nj00040j1.pdf [file d0nj00040j1.pdf]

Supporting Information

**Structure and electrochemical properties of hierarchically porous carbon nanomaterials derived from hybrid ZIF-8/ZIF-67 bi-MOF coated cyclomatrix poly (organophosphazene) nanospheres**

Yutao Zhou<sup>a</sup>, Alan M. Wemyss<sup>a</sup>, Oliver B. Brown<sup>a</sup>, Qianye Huang<sup>b</sup>, Chaoying Wan<sup>a\*</sup>

\*Corresponding author: [Chaoying.wan@warwick.ac.uk](mailto:Chaoying.wan@warwick.ac.uk)

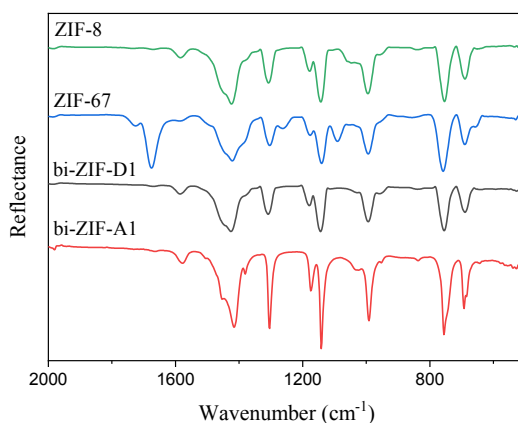

Figure S1 FTIR results of ZIF-8, ZIF-67 and hybrid ZIF8/ZIF67 bi-ZIFs

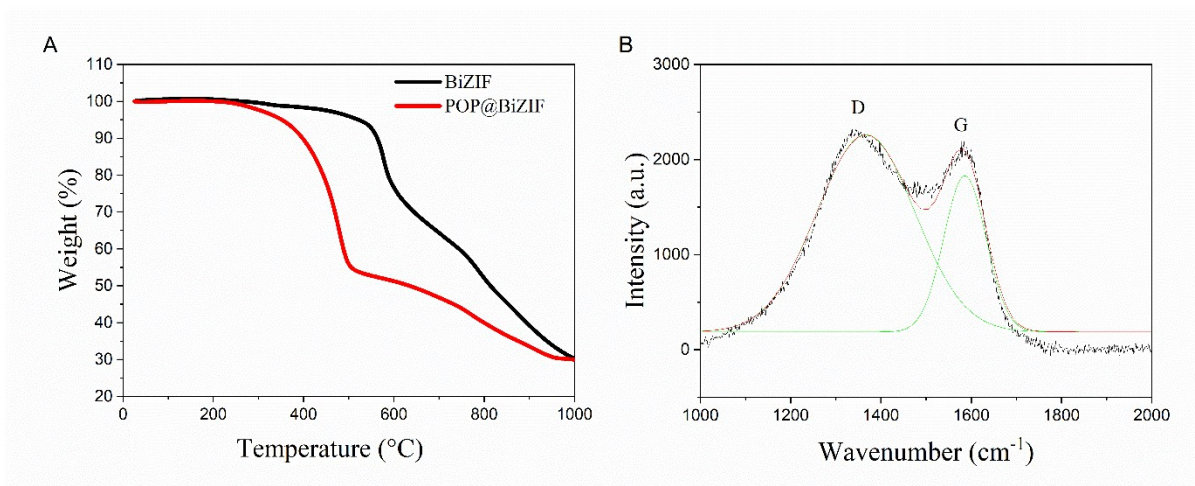

Figure S2 A) TGA results of bi-ZIF A1 and POP/bi-ZIF-A1 core@shell structure and B) Raman results of POP/bi-ZIF Structure
